# Supplementary material for: Key roles for phosphorylation and the Coiled-coil domain in TRIM56-mediated positive regulation of TLR3-TRIF–dependent innate immunity
Source: PubMed Central journal article supplement (PMC11067339; doi:10.1016/j.jbc.2024.107249), 2024-03-29

## Supplemental Figures

### Key Roles for Phosphorylation and the Coiled-coil Domain in TRIM56-mediated Positive Regulation of TLR3-TRIF-dependent Innate Immunity

Benjamin M. Liu, Nan L. Li, Ruixue Wang, Xiaofan Li, Z. Alex Li, Tony N. Marion, and Kui Li

**Fig. S1. Sequence alignment of murine and human TRIM56 proteins.** The predicted RING, B-Box, Coiled-coil, and NHL-like domains are shaded yellow, green, blue, and grey, respectively. Residues that are missing in murine or human TRIM56 are shown in red letters.

**Fig. S2. Transient expression of plasmid vectors encoding TRIM56 and its mutants. (A)** Schematic representation of wild-type (WT) TRIM56 and its various deletion mutants. R, B and CC denote RING, B-box, and Coiled-coil domains, respectively. The C-terminal putative NHL-like repeats are depicted as filled blue boxes. **(B)** Immunoblot analysis of the expression of plasmid vectors encoding C-terminally V5-tagged, WT TRIM56 and the indicated mutants, respectively, in transiently transfected HEK293-TLR3 cells using mouse anti-V5 mAb. Actin served as a loading control.

**Fig. S3. Impact of mutations of putative phosphorylation site Ser<sup>710</sup> in the C-terminal portion of TRIM56 on activation of the IFN- $\beta$  promoter downstream of TLR3 signaling.**

HeLa cells stably expressing a non-targeting, scrambled control shRNA (HeLa-shCtrl) were transfected with an empty vector ("vector") or a plasmid vector encoding WT or the indicated mutant human TRIM56, along with internal control plasmid pRL-TK and reporter plasmid pIFN- $\beta$ -Luc, followed by mock stimulation or stimulation by poly-I:C for 8 h. Dual luciferase reporter assay was then performed. Statistical analysis was performed between the indicated groups after poly-I:C stimulation. Single and double asterisks denote that statistical differences exist with a *P* value of  $< 0.05$  and  $< 0.01$ , respectively. N.S., not statistically significant. pIC, poly-I:C.

**Fig. S4. Hydrophobicity scales assigned for different regions of human TRIM56 protein by ProtScale using the method described by Kyte & Doolittle (56).** X-axis denotes aa position, while Y-axis values are scores that determine the relative hydrophobicity of aa residues. Note that residues 371-484 are predicted to be a disordered region.

# Figure S1

Identities = 610/756 (81%), Positives = 659/756 (87%), Gaps = 23/756 (3%)

```
mouse      MNSKDSSPTLLEALSSDFLACKIKICLEQLHTPKTLPCLHLYCQDCLAQLDIGGQVRCPECR 60
human      MVSHGSSPSLLEALSSDFLACKIKICLEQLRAPKTLPCLHLYCQDCLAQLADGGRRVRCPECR 60
* * : . *** : ***** : : ***** * : *****

mouse      EIVPVPAEGVAAFKTNFFVNGLLDLVKARAPGDVHSGKPTCALCPLVGGKSSGGPATARC 120
human      ETVVPVPEGVASFKTNFFVNGLLDLVKARACGDLRAGKPACALCPLVGGTSTGGPATARC 120
* **** . *** : ***** * * : : *** : ***** . * : *****

mouse      LDCADDLQCACADGHRCSRQTHKHRVVDLVGYRAGWYDEEAREFQASQCPQHPGEALCFL 180
human      LDCADDLQCACADGHRCTRQTHTRVVDLVGYRAGWYDEEARERQAAQCPQHPGEALRFL 180
***** : * * . ***** : ***** * *

mouse      CQPCSQLLCKDCRLGPHIDHPCLPLAEAVRSRKPGLLELLAGVDSNLVELEATRVAEKEA 240
human      CQPCSQLLCRECLDPHLDPCLPLAEAVRARRPGLLELLAGVDNNLVELEAARRVEKEA 240
***** : * * . * * : ***** : * : * * * * * * * * * * * * * * * * *

mouse      LALLREQAASVGTQVEEAAERILKSLLAQKQEVVLGQLRALVEAAEEATRERLTKIEREQE 300
human      LARLREQAARVGTQVEEAAEGVLRALLAQKQEVVLGQLRAHVEAAEEAARERLAELEGREQ 300
* * * * * * * * * * * * * * * * * * : : * * * * * * * * * * * * * * * * * *

mouse      VAKAAAAFARRVLSLGLEAEILSLEGAITQRLRQLQDAPWTSGPTRCVLPQLELHPGLED 360
human      VARAAAAFARRVLSLGREAEILSLEGAIQRLRQLQGCPWAPGPAPCLLPQLELHPGLLD 360
* * : ***** * * * * * * * * * * * * * * * * * * * * * * * * * * * * *

mouse      KNCHLLRLIFEEFKQSPKDSGKGGAGTQGGDEAQQGGDDRTKIGKQGAQP-----LTP 414
human      KNCHLLRLSFEE-QQPQKDGKDGAGTQGGDEESQSRREDEPKTERQGGVQPQAGDGAQTP 419
***** * * * * * * * * * * * * * * * * * * * * * * * * * * * * * *

mouse      KE-----GKDQNPQEDDGVFIERNRPNKKKKCKGRGKSVSREPSPILR 458
human      KEEKAQTTRREGAQTLEE DRAQTPHEDGGPQPHRGRPNKKKKFKGRKLSISREPSPALG 479
* * * * * * * * * * * * * * * * * * * * * * * * * * * * * *

mouse      PNLEGSGLLRPVSFWSFPTRMPGDKRSPRITGLCPYGPQEILVADEQNRVLKRFSLNGD 518
human      PNLDGSGLLRPVIFYCSFPTRMPGDKRSPRITGLCFPGPREILVADEQNRALKRFSLNGD 539
* * : ***** : * * * * * * * * * * * * * * * * * * * * * * * * * * * * *

mouse      YKGTQVQPEGCSPCSVAALQNAVAFSANAKLYLVSPDGEIQWRRSLSLTQSSHAVAAMPC 578
human      YKGTVPVPEGCSPCSVAALQSAVAFSASARLYLINPGEVQWRRALSLSQASHAVAALPS 599
***** * * * * * * * * * * * * * * * * * * * * * * * * * * * * *

mouse      GDRVAVSVAGHVEVYKKGDSLATRFIPGGKASRGQRALVFLTTSPQGNFVGSQSDWQQNSVV 638
human      GDRVAVSVAGHVEVYNMEGSLATRFIPGGKASRGLRALVFLTTSPQGHFVGSQSDWQQNSVV 659
***** : * * * * * * * * * * * * * * * * * * * * * * * * * * * * *

mouse      FCDGLGQVIWEYKGPGLHGCQPGSVSVDKKGYIFLTLREVNVVILDPKGSLLGDFLTAY 698
human      ICDGLGQVVG EYKGPGLHGCQPGSVSVDKKGYIFLTLREVNVVILDPKGSLLGDFLTAY 719
: ***** : ***** * * * * * * * * * * * * * * * * * * * * * * * * * * * * *

mouse      HGLEKPRVTTMVDGKYLVSLSNGTIHVFRVRFPS 734
human      HGLEKPRVTTMVDGRYLVLSLSNGTIHVFRVRFPS 755
***** : ***** * * * * * * * * * * * * * * * * * * * * * * * * * * * * *
```

# Figure S2

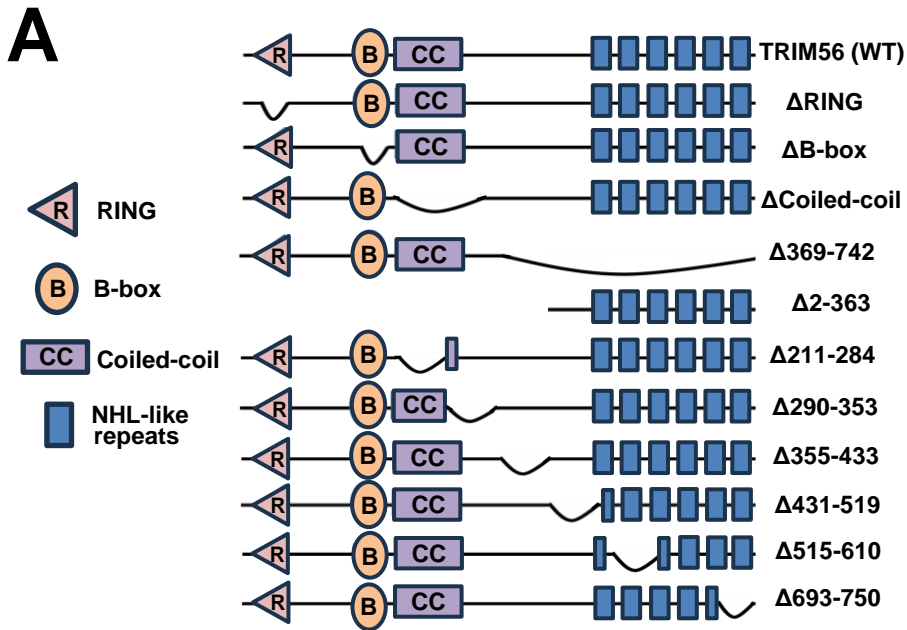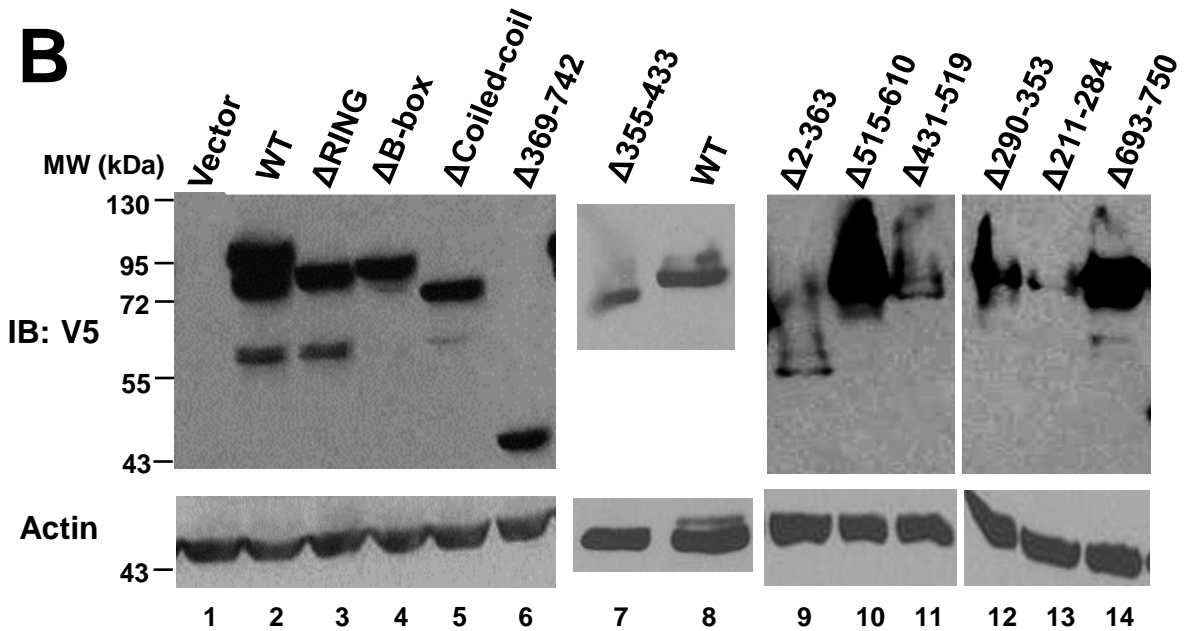

Figure S3

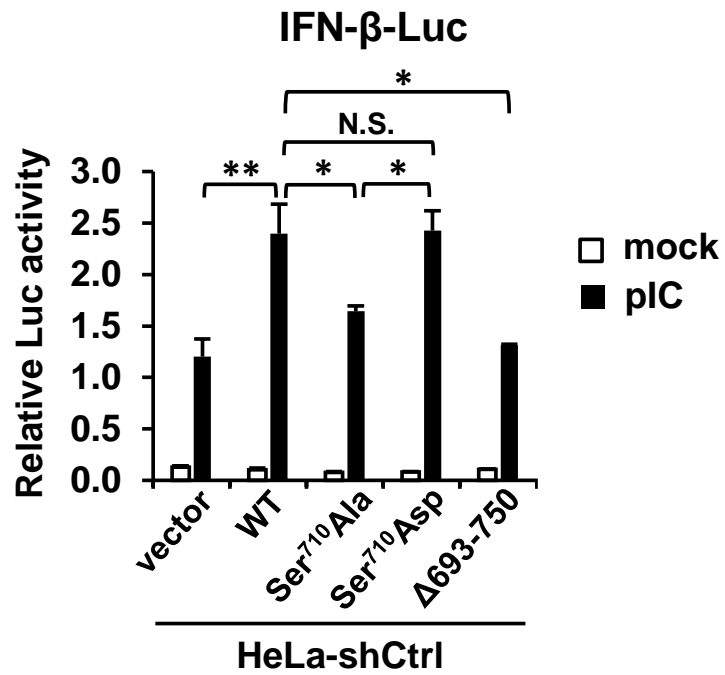

# Figure S4

ProtScale output for TRI56\_HUMAN

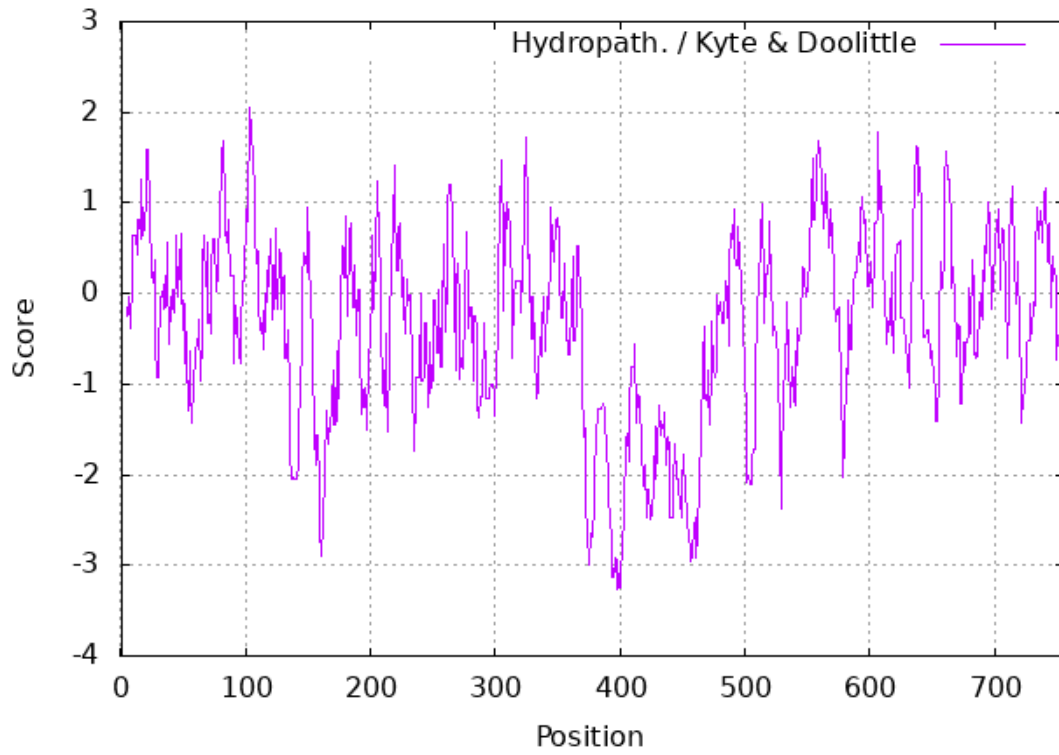

Supplement: mmc1.pdf [file mmc1.pdf]
